# Supplementary material
Source: ML conference proceedings conference paper supplement (https://openreview.net/forum?id=rY4sA9qYKy)

No normalization

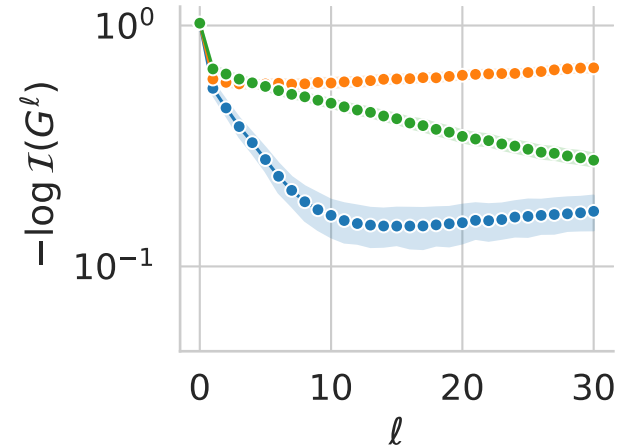

layer

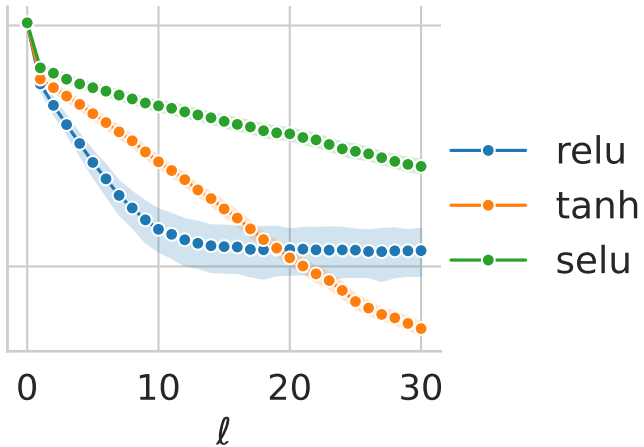

Supplement: supplementary_material [file attachment]

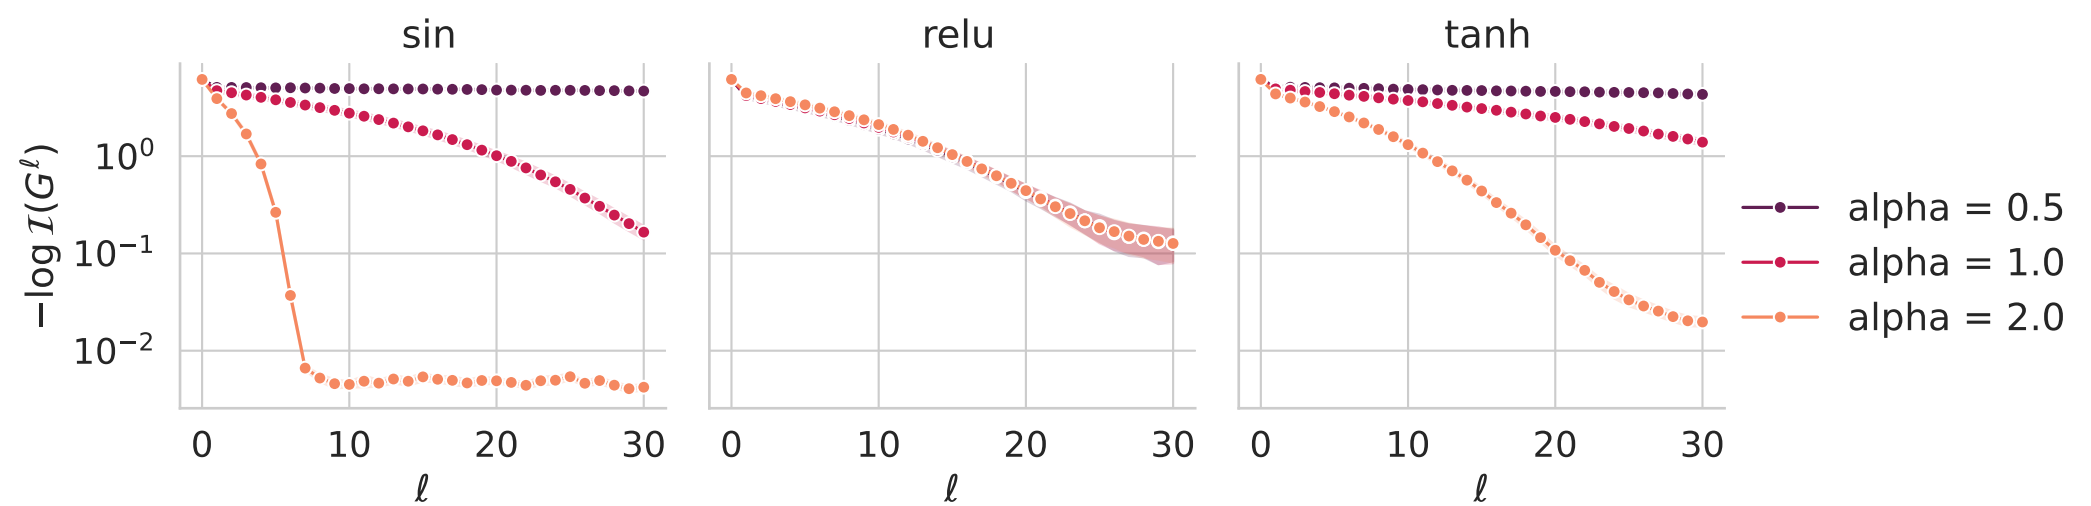

Supplement: supplementary_material [file attachment]

normalization bias

layer

$10^{-2}$

$10^{-4}$

0

10

20

30

$\ell$

batch

0

10

20

30

$\ell$

relu  
identity

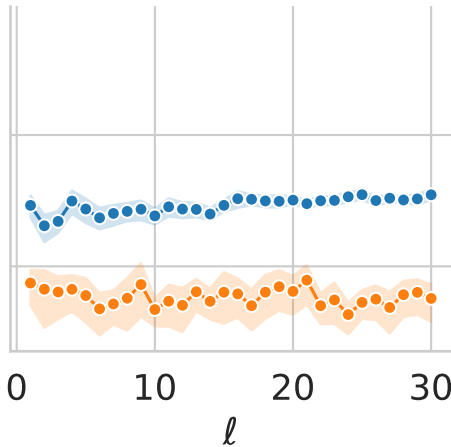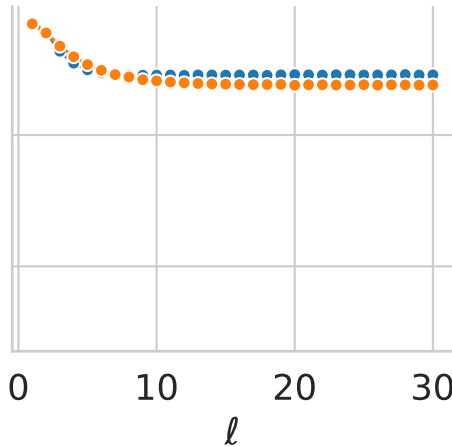

Supplement: supplementary_material [file attachment]

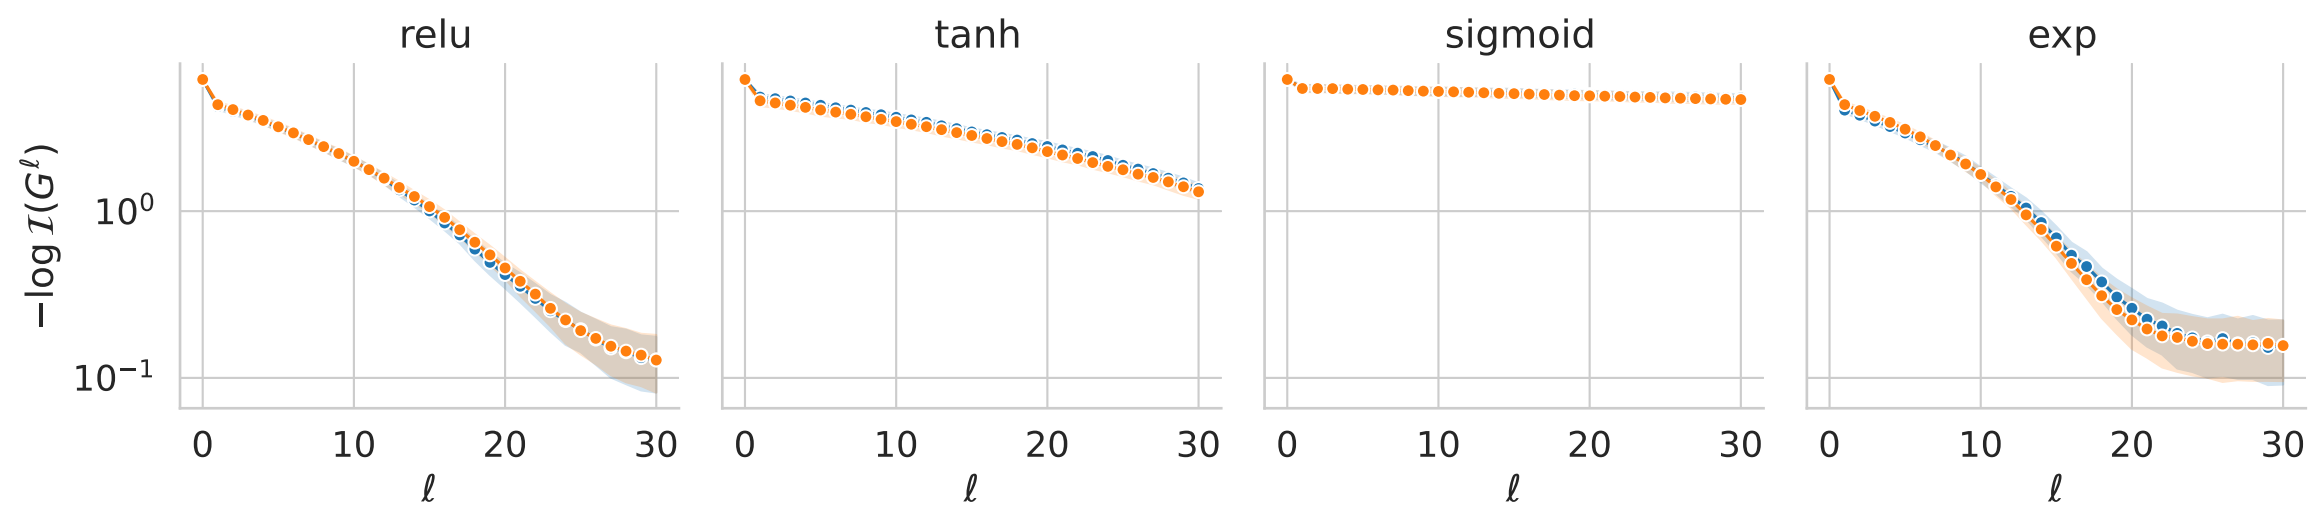

Supplement: supplementary_material [file attachment]

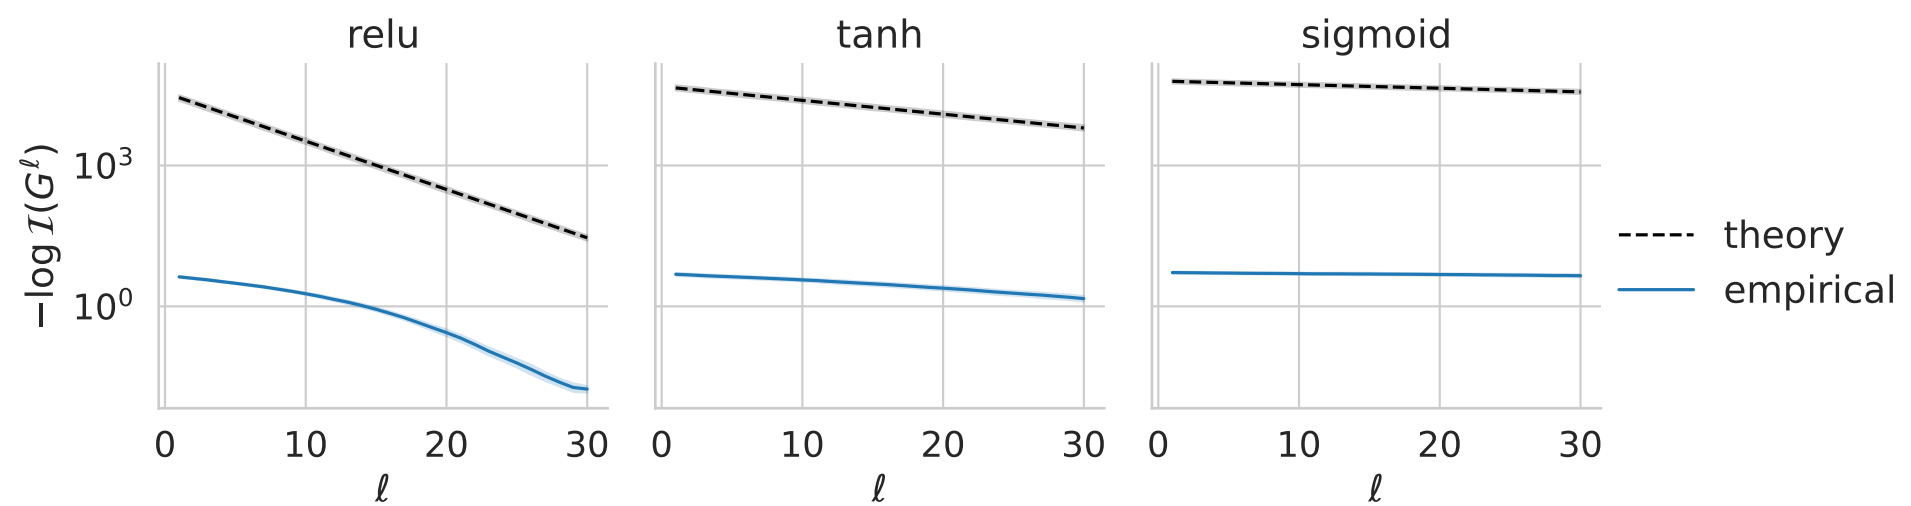

Supplement: supplementary_material [file attachment]

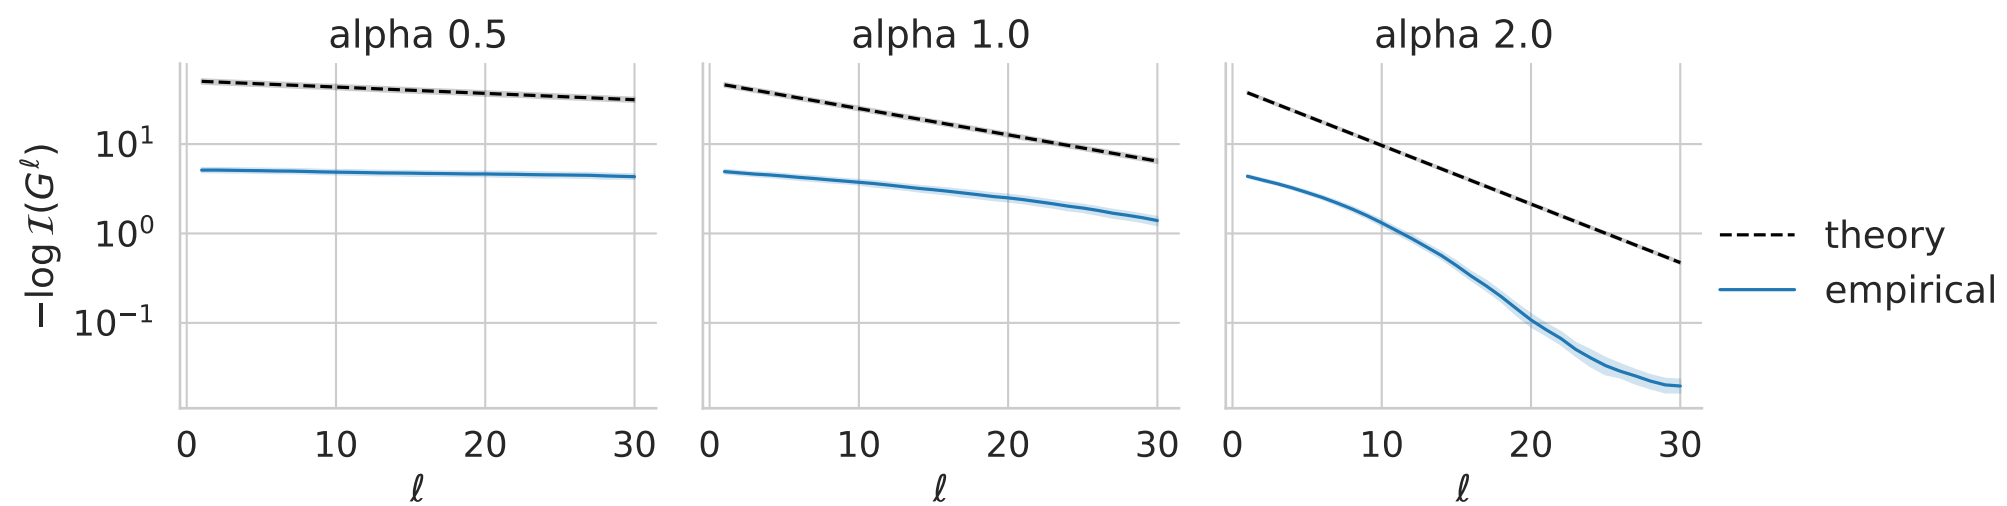

Supplement: supplementary_material [file attachment]

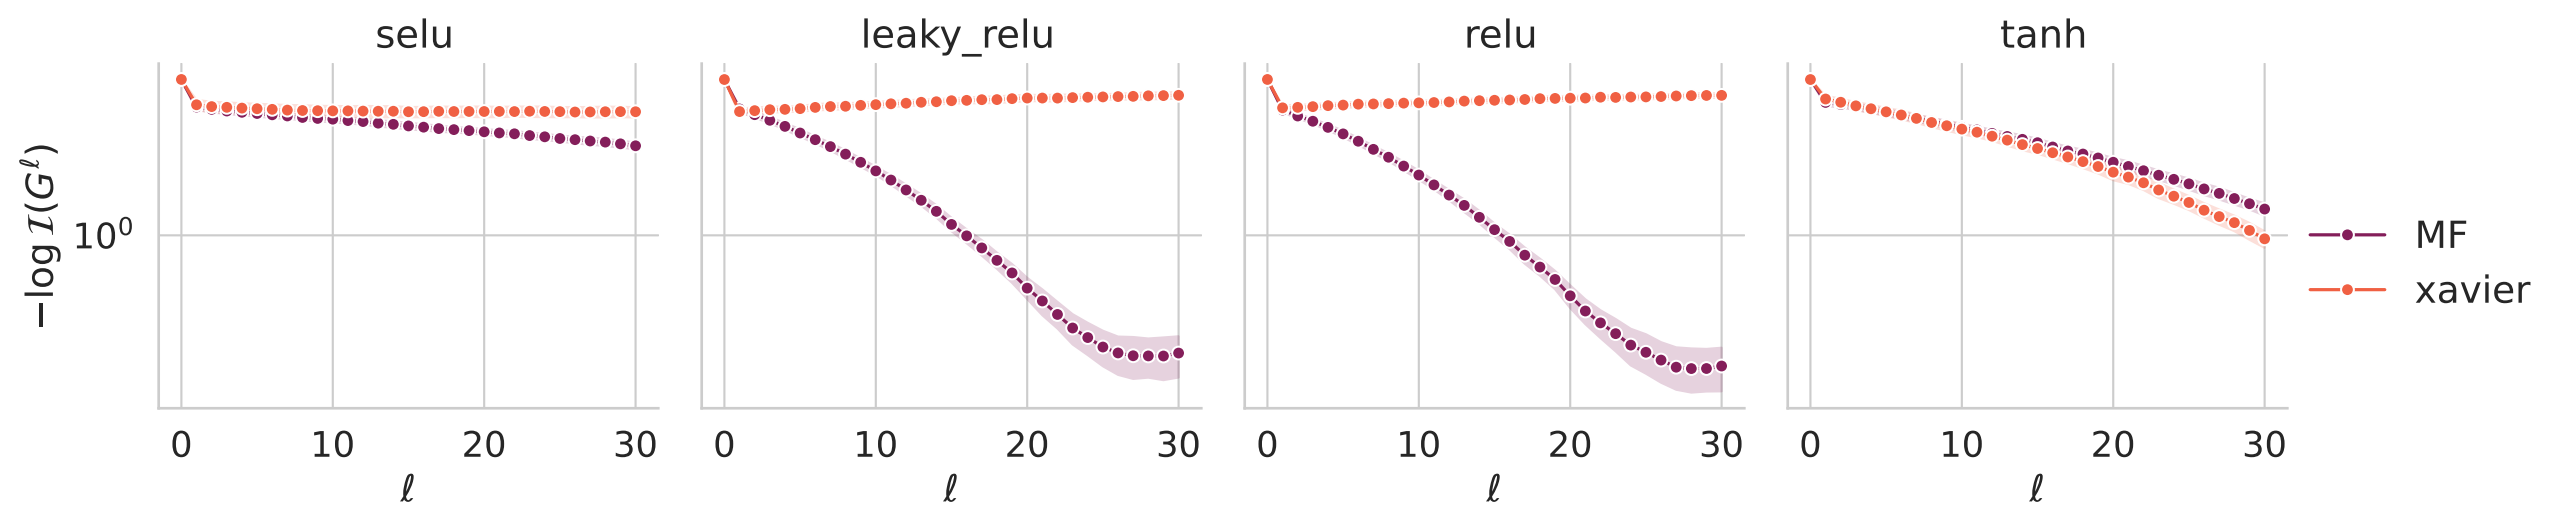

Supplement: supplementary_material [file attachment]

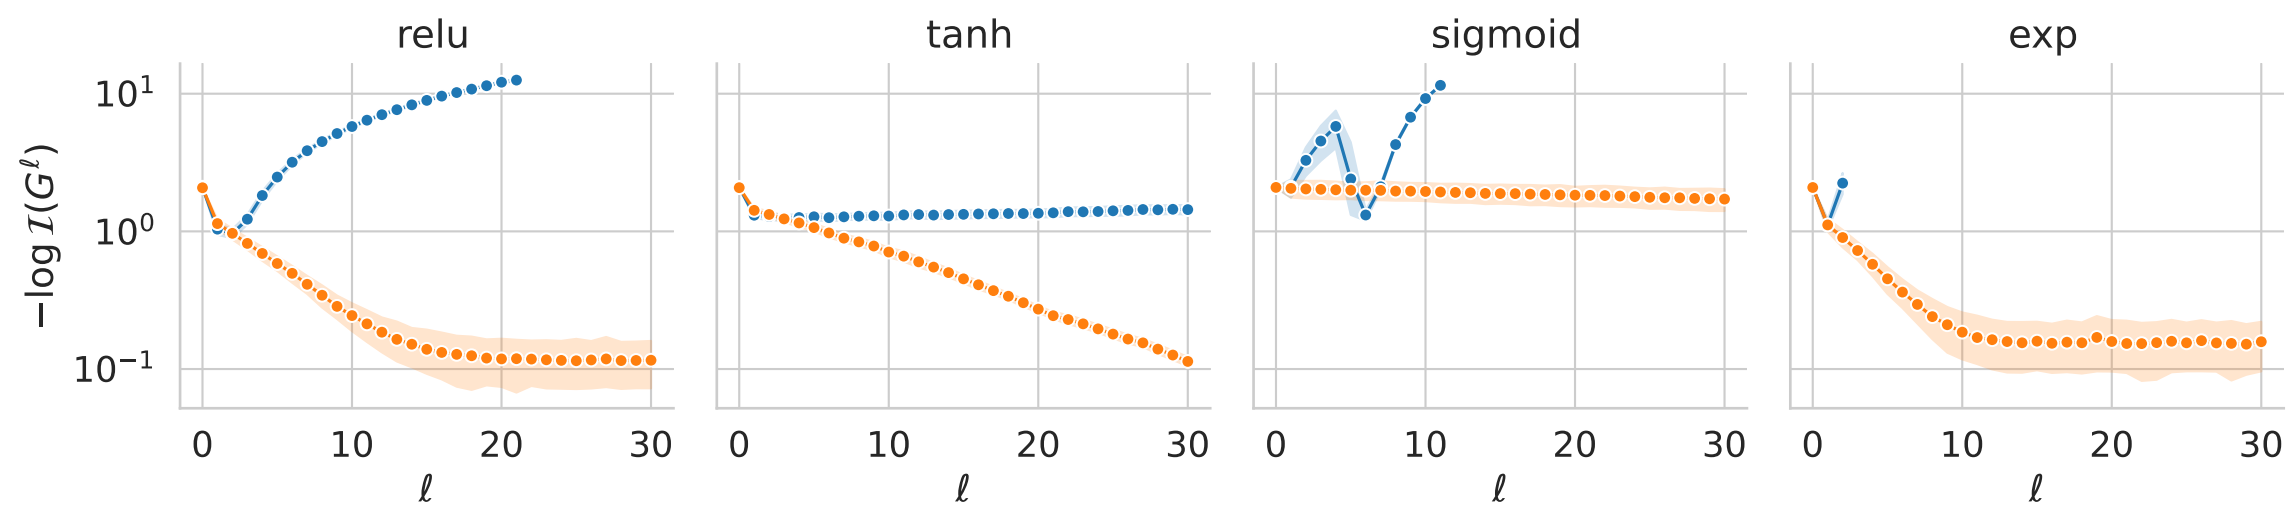

Supplement: supplementary_material [file attachment]

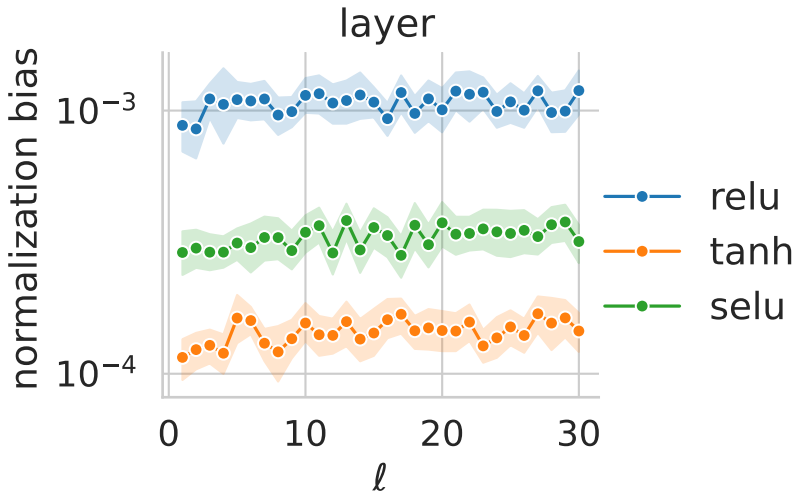

Supplement: supplementary_material [file attachment]

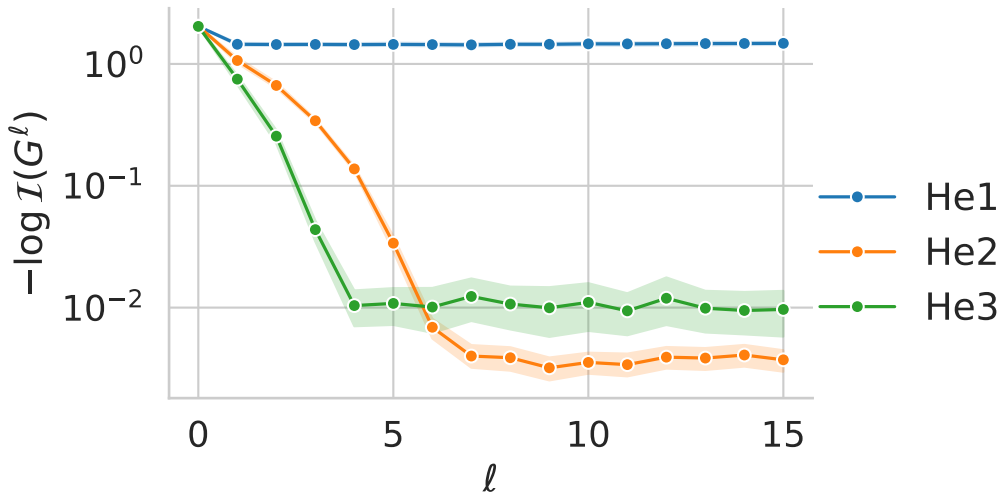

Supplement: supplementary_material [file attachment]

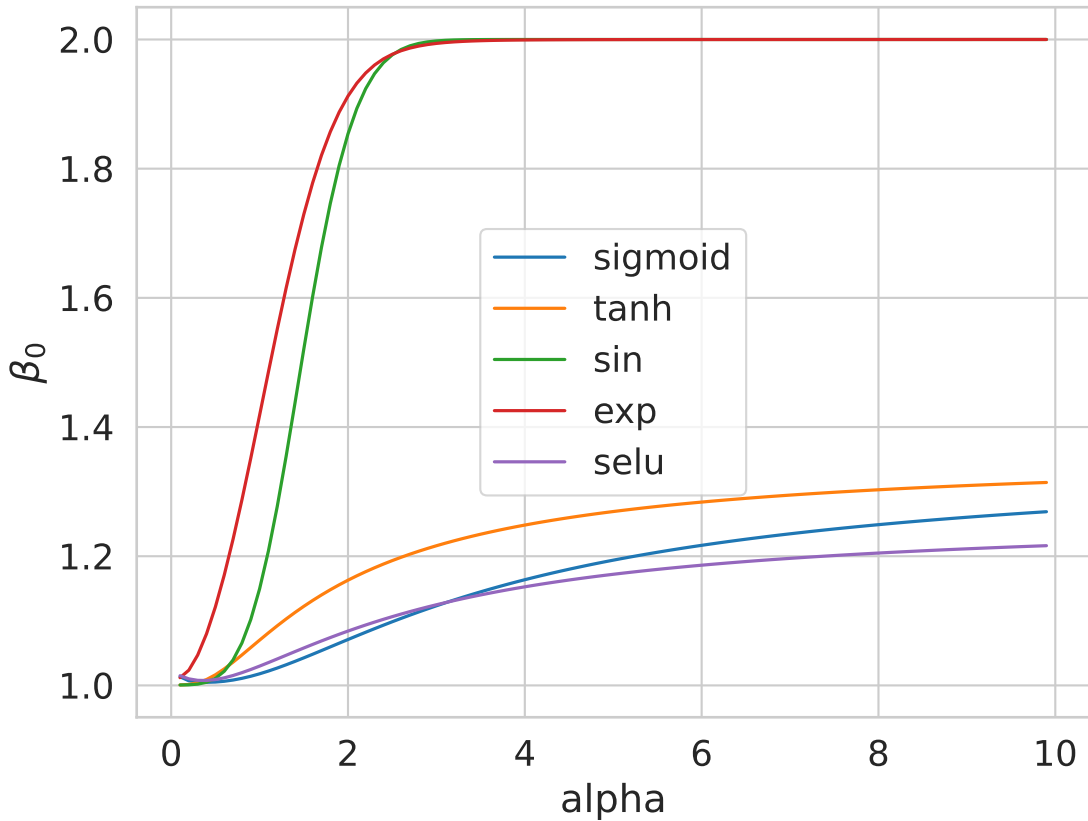

Supplement: supplementary_material [file attachment]

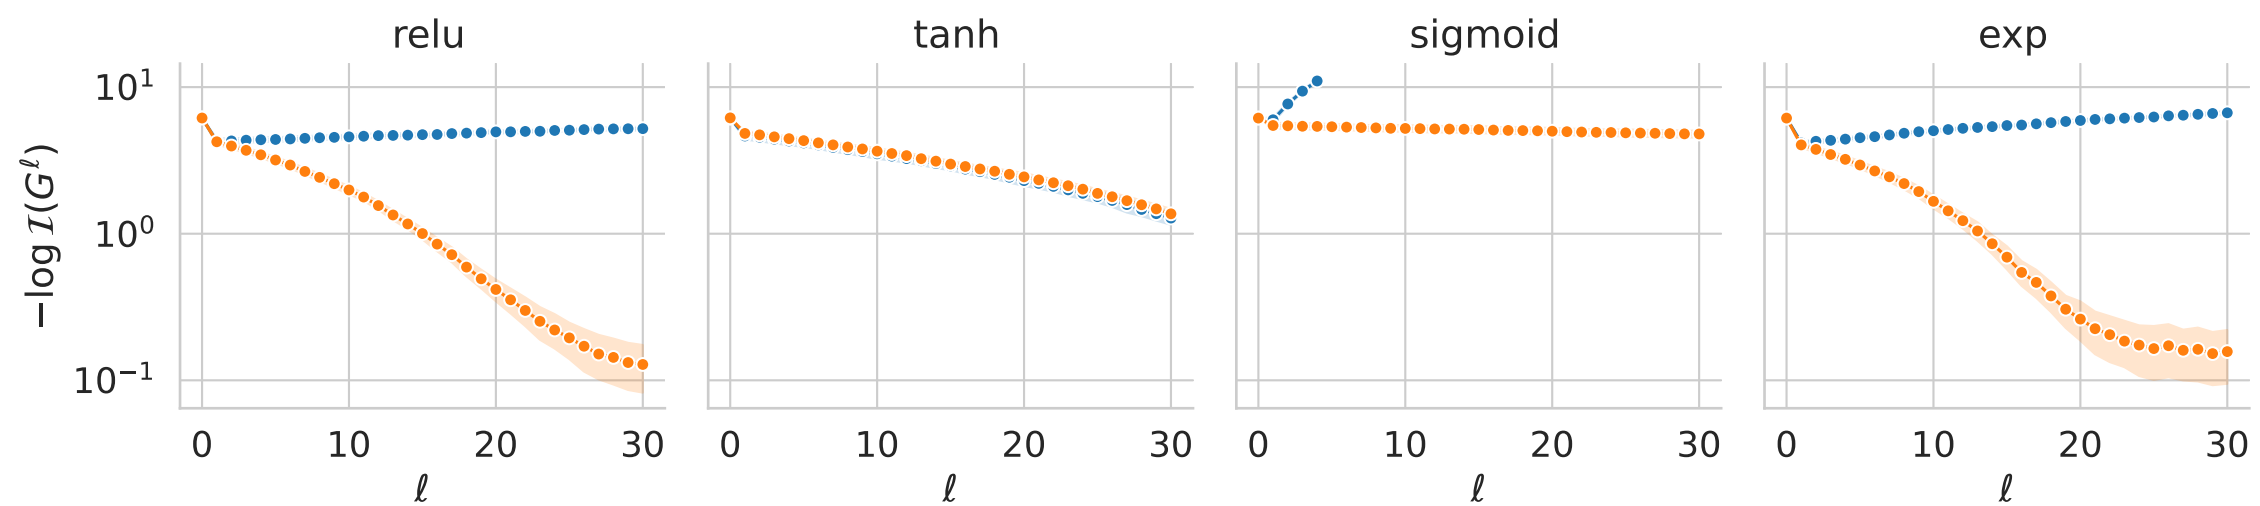

Supplement: supplementary_material [file attachment]

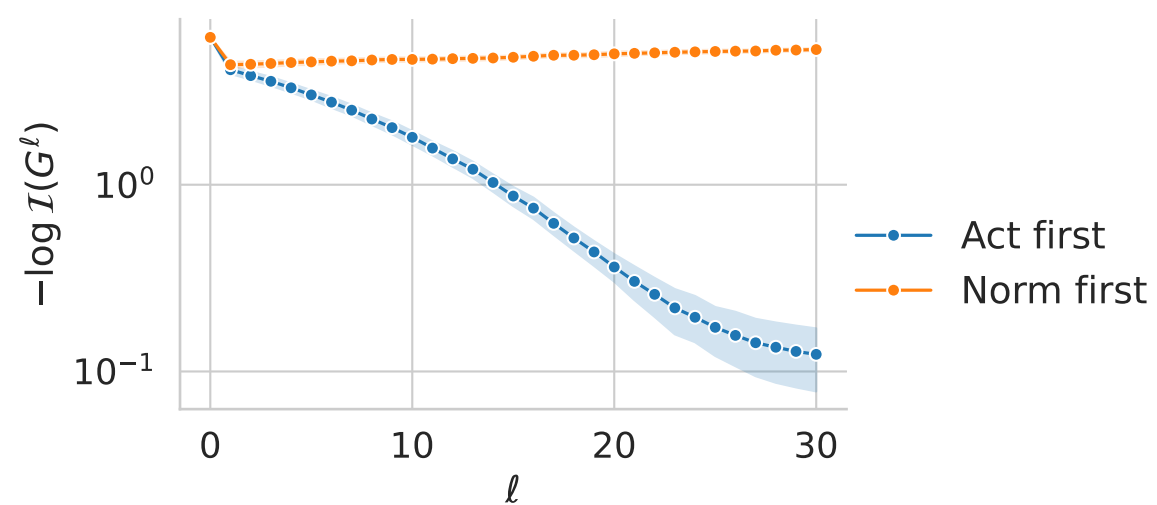

Supplement: supplementary_material [file attachment]

layer

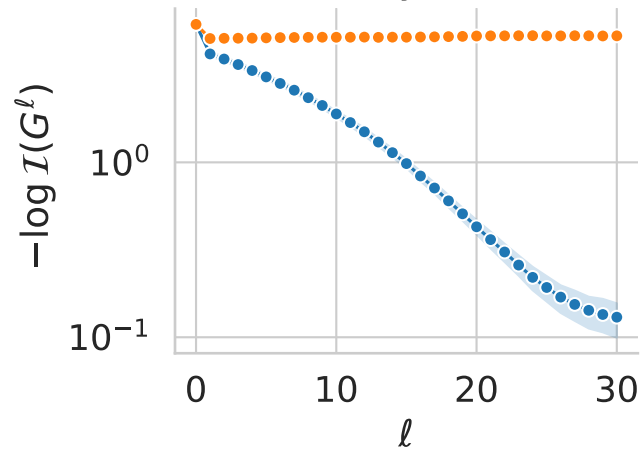

batch

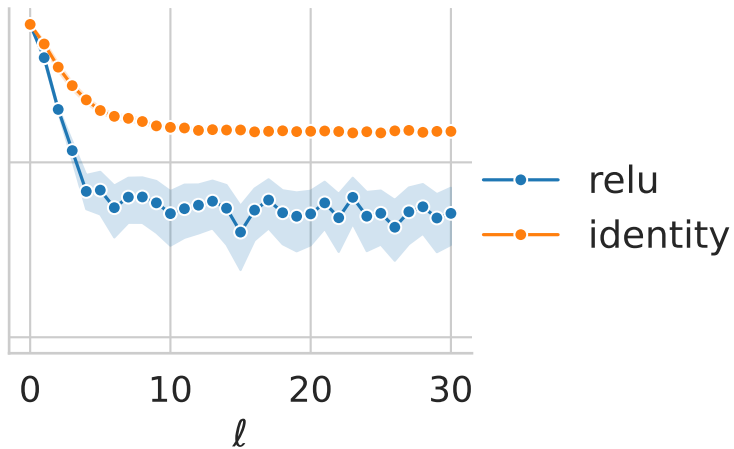

Supplement: supplementary_material [file attachment]

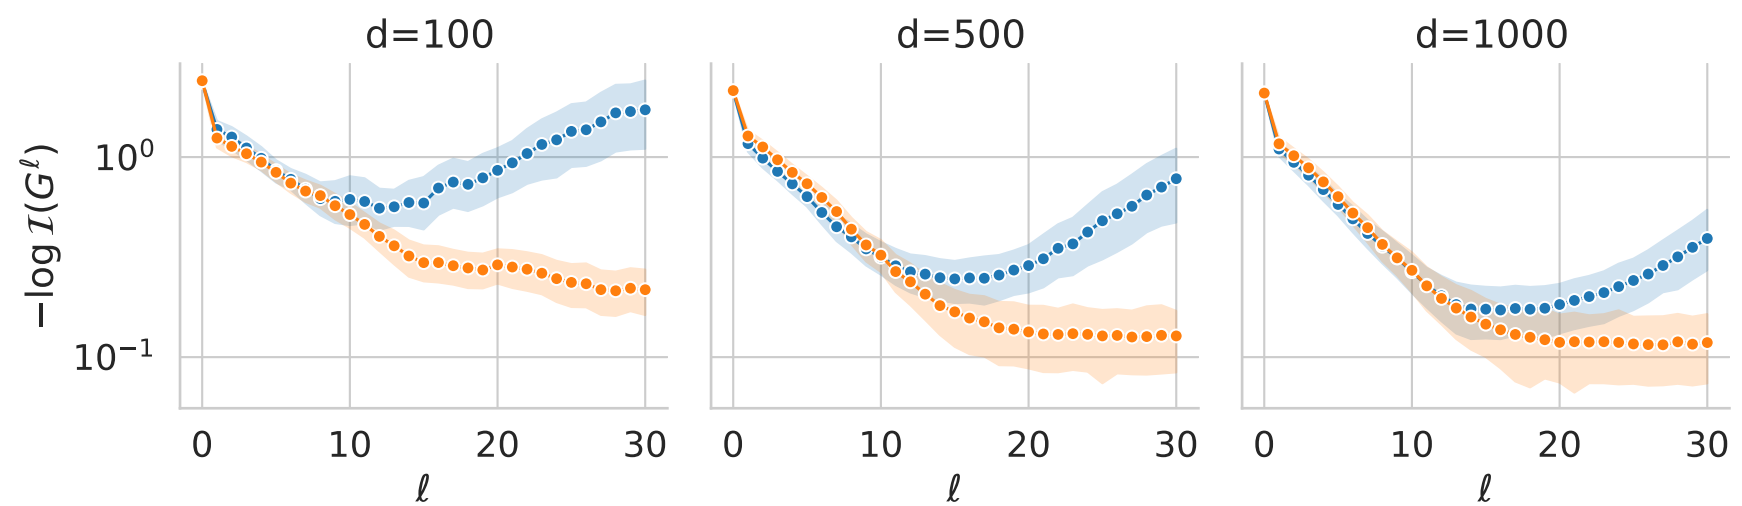

Supplement: supplementary_material [file attachment]

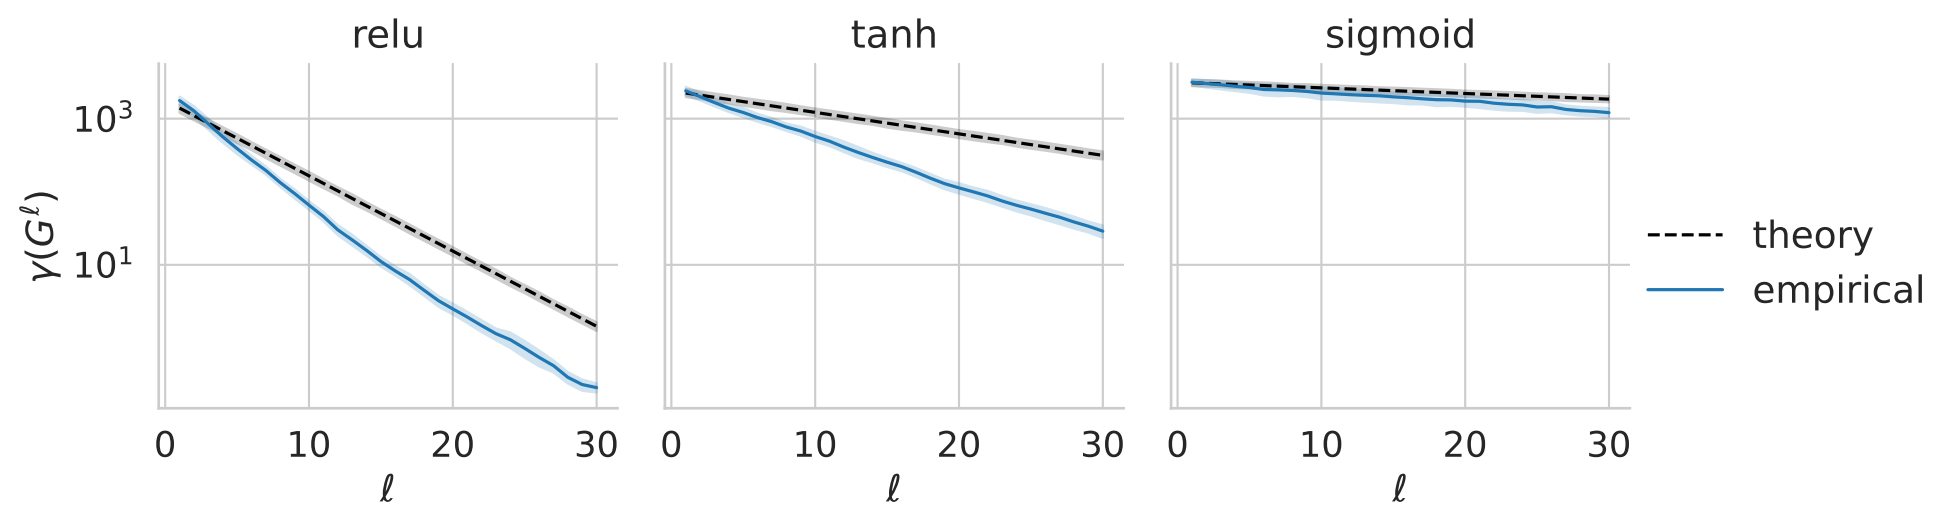

Supplement: supplementary_material [file attachment]

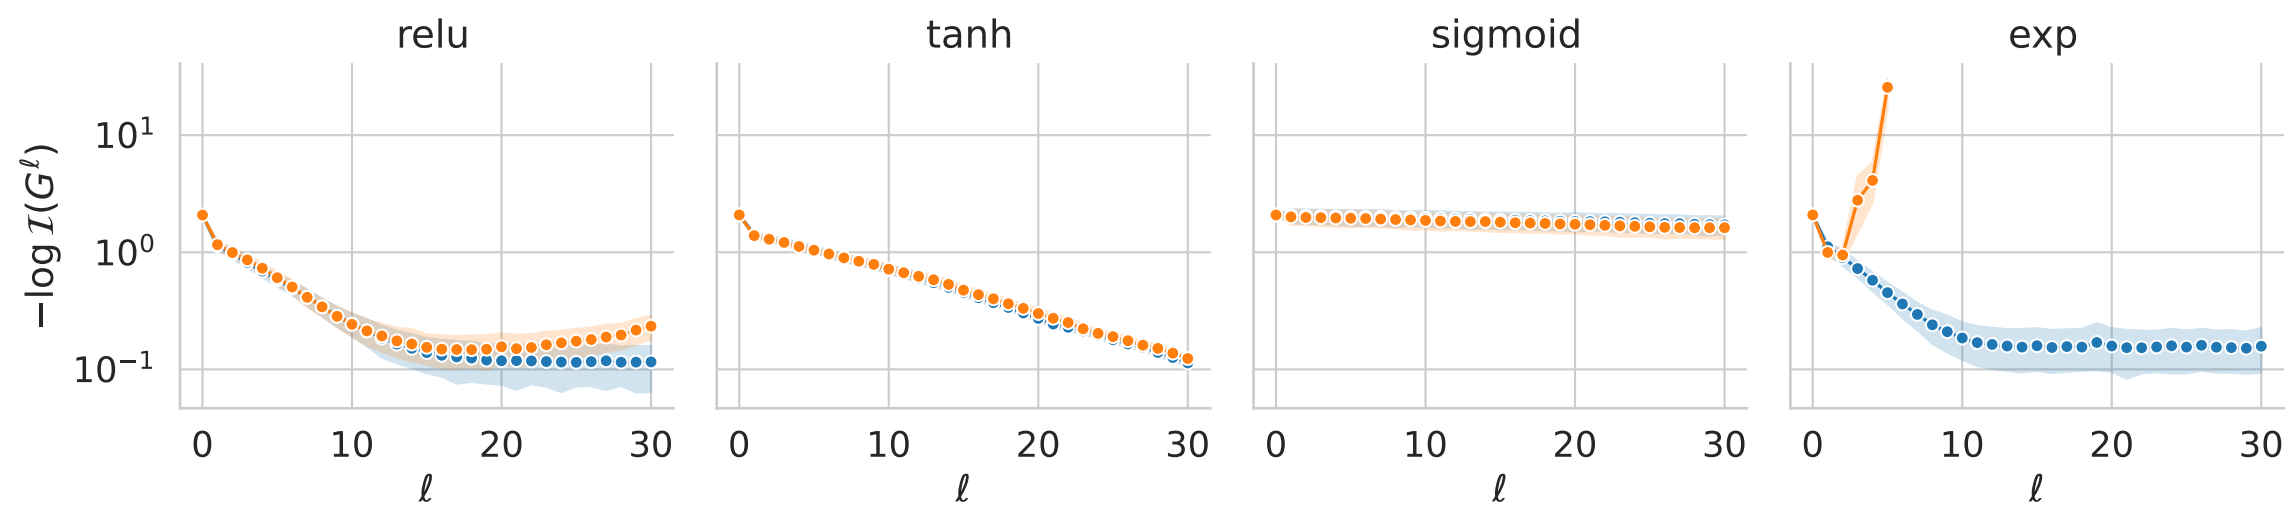

Supplement: supplementary_material [file attachment]
